# Supplementary material for: The role of a community conversation intervention in reducing stigma related to lower limb lymphoedema in Northern Ethiopia
Source: Springer Nature journal article supplement (doi:10.1186/s12913-024-10864-w), 2024-03-19
Supplement: MOESM1 [file 26876654]

# Lymphoedema in Awi zone Community Survey questionnaire

## Identification

|                      |                      |                                                    |
|----------------------|----------------------|----------------------------------------------------|
| <b>Woreda:</b> _____ | <b>Kebele:</b> _____ | <b>Gott or Cluster No (Enumeration are):</b> _____ |
|----------------------|----------------------|----------------------------------------------------|

Time interview started: \_\_\_\_\_:

Time interview ended: \_\_\_\_\_

DATA COLLECTOR:

SUPERVISOR:

Name: \_\_\_\_\_

Name: \_\_\_\_\_

Date: \_\_\_\_\_

Date: \_\_\_\_\_

Signature: \_\_\_\_\_

Signature: \_\_\_\_\_

| NO                                                                                                 | QUESTIONS AND FILTERS                                                                          | CODING CATEGORIES                                                                                                                                  | SKIP | Ansr |
|----------------------------------------------------------------------------------------------------|------------------------------------------------------------------------------------------------|----------------------------------------------------------------------------------------------------------------------------------------------------|------|------|
| <b>Section 1:<br/>Background</b>                                                                   |                                                                                                |                                                                                                                                                    |      |      |
| 101                                                                                                | Name of respondents                                                                            |                                                                                                                                                    |      |      |
| 102                                                                                                | How old are you? (in completed years)                                                          | .....Years                                                                                                                                         |      |      |
| 103                                                                                                | What is your religion?                                                                         | Orthodox...1 Protestant .... 2 Muslim ... 3<br>Other ..... 88                                                                                      |      |      |
| 104                                                                                                | What is your ethnicity?                                                                        | Amhara .....1 Oromo.....2<br>Other (Specify)... ..... 88                                                                                           |      |      |
| 105                                                                                                | What is your occupation, that is, what kind of work do you mainly do as a means of livelihood? | Housewife..... 1 Farmer..... 2<br>Merchant/ Pettytrader ...3 Student .....4<br>Civil servant..... .5 Daily laborer.....6<br>Other ..... 88         |      |      |
| 106                                                                                                | What is the highest grade you completed?                                                       | Cannot read and write .....0 No formal school but can read & Write. .... 2<br>University/College diploma... .... 3<br>Formal education grade ..... |      |      |
| 107                                                                                                | Are you currently attending formal school?                                                     | Yes .....1 No..... 0                                                                                                                               |      |      |
| 108                                                                                                | What is your marital status                                                                    | Single.....1<br>Married... .. 2<br>Separated/divorced .....3<br>Widowed.....4                                                                      |      |      |
| 109                                                                                                | Partner's occupation                                                                           | Housewife..... 1 Farmer..... 2<br>Merchant/ Pettytrader ...3 Student .....4<br>Civil servant..... .5 Daily laborer.....6<br>Other..... ..... 88    |      |      |
| 110                                                                                                | What is the highest grade of education your partner attended?                                  | Cannot read and write .....0<br>No formal school but can read & Write. ... 2<br>University/College diploma... . 3<br>Grade .....                   |      |      |
| 111                                                                                                | How many years have you lived in this location?                                                | ..... Years                                                                                                                                        |      |      |
| 112                                                                                                | Number of people lining in this household (including you)                                      | .....                                                                                                                                              |      |      |
| 113                                                                                                | Number of under 7 years children in this household?                                            | .....                                                                                                                                              |      |      |
| 114                                                                                                | What is your/family income (monthly)<br>'refer last year's annual income in farmers/traders'   | ..... birr                                                                                                                                         |      |      |
| 115                                                                                                | How do you perceive you're your economic states relative to other peoples in the kebele?       | Poor.....1 Average.....2 Better of.....3                                                                                                           |      |      |
| <b>Section 2:<br/>Information source assessment</b>                                                |                                                                                                |                                                                                                                                                    |      |      |
| 201                                                                                                | How often do you read a newspaper or magazine?                                                 | Every day ...1 Sometimes ...2 Not at all...3                                                                                                       |      |      |
| 202                                                                                                | How often do you listen to the radio?                                                          | Every day ...1 Sometimes ...2 Not at all...3                                                                                                       |      |      |
| 203                                                                                                | How often do you watch television?                                                             | Every day ...1 Sometimes ...2 Not at all...3                                                                                                       |      |      |
| 204                                                                                                | Have you ever attended a health education session?                                             | Every day ...1 Sometimes ...2 Not at all...3                                                                                                       |      |      |
| 205                                                                                                | How often do you participate in meetings/ conferences prepared by the kebele or the district?  | Every day ...1 Sometimes ...2 Not at all...3                                                                                                       |      |      |
| <b>Section 3: knowledge about Cause of lymphoedema<br/>(elephantiasis (LF or Podo or leprosy))</b> |                                                                                                |                                                                                                                                                    |      |      |
| 501                                                                                                | Lymphoedema is caused by contact with affected people                                          | Yes .....1 No .....0                                                                                                                               |      |      |
| 502                                                                                                | Lymphoedema I is caused by bad things happening to you.                                        | Yes .....1 No .....0                                                                                                                               |      |      |
| 503                                                                                                | Lymphoedema I is God's punishment.                                                             | Yes .....1 No .....0                                                                                                                               |      |      |
| 504                                                                                                | Lymphoedema is caused by contact with soil                                                     | Yes .....1 No .....0                                                                                                                               |      |      |

|                                                                                      |                                                                                                        |            |           |  |  |
|--------------------------------------------------------------------------------------|--------------------------------------------------------------------------------------------------------|------------|-----------|--|--|
| 505                                                                                  | Lymphoedema is caused by a personal weakness                                                           | Yes .....1 | No .....0 |  |  |
| 506                                                                                  | Lymphoedema is randomly occurring                                                                      | Yes .....1 | No .....0 |  |  |
| 507                                                                                  | Lymphoedema is caused by being possessed by a demon (evil spirit)                                      | Yes .....1 | No .....0 |  |  |
| 508                                                                                  | Lymphoedema is caused by flies                                                                         | Yes .....1 | No .....0 |  |  |
| 509                                                                                  | Lymphoedema is caused by mosquitos                                                                     | Yes .....1 | No .....0 |  |  |
| 510                                                                                  | Lymphoedema is caused by stepping on snakes or dead animals                                            | Yes .....1 | No .....0 |  |  |
| 511                                                                                  | Ask them if there are other causes (Please specify)                                                    | _____      |           |  |  |
| 512                                                                                  | Do you know someone who has lymphoedema or foot problems? (elephantiasis: LF, podo or leprosy)         | Yes .....1 | No .....0 |  |  |
| 513                                                                                  | Is there any one in your house who is suffering from lymphoedema?                                      | Yes .....1 | No .....0 |  |  |
| 514                                                                                  | Do you have any relative or close person who has lymphoedema?                                          | Yes .....1 | No .....0 |  |  |
| 515                                                                                  | What are the signs and symptoms that individuals with lymphoedema show? ( <i>ask person to list</i> )  |            |           |  |  |
| <b>Section 4: Knowledge about people with lymphoedema due to LF, podo or leprosy</b> |                                                                                                        |            |           |  |  |
| 601                                                                                  | People with lymphoedema are largely to blame for their own condition.                                  | Yes .....1 | No .....0 |  |  |
| 602                                                                                  | People with lymphoedema are not capable of true friendship.                                            | Yes .....1 | No .....0 |  |  |
| 603                                                                                  | People with lymphoedema can work.                                                                      | Yes .....1 | No .....0 |  |  |
| 604                                                                                  | Anyone can suffer from lymphoedema.                                                                    | Yes .....1 | No .....0 |  |  |
| <b>Section 5: Attitudes towards people with lymphoedema</b>                          |                                                                                                        |            |           |  |  |
| 701                                                                                  | People with lymphoedema should be prevented from having children.                                      | Yes .....1 | No .....0 |  |  |
| 702                                                                                  | People with lymphoedema should not get married.                                                        | Yes .....1 | No .....0 |  |  |
| 703                                                                                  | People with lymphoedema should not be allowed to make decisions, even those concerning routine events. | Yes .....1 | No .....0 |  |  |
| 704                                                                                  | I could maintain a friendship with someone with lymphoedema.                                           | Yes .....1 | No .....0 |  |  |
| 705                                                                                  | I could marry someone with lymphoedema.                                                                | Yes .....1 | No .....0 |  |  |
| 706                                                                                  | I would be afraid to have a conversation with someone with lymphoedema.                                | Yes .....1 | No .....0 |  |  |
| 707                                                                                  | People with lymphoedema should have the same rights as anyone else.                                    | Yes .....1 | No .....0 |  |  |
| 708                                                                                  | I would be upset or disturbed about working on the same job as someone with lymphoedema.               | Yes .....1 | No .....0 |  |  |
| 709                                                                                  | I would be ashamed if people knew that someone in my family had been diagnosed with lymphoedema.       | Yes .....1 | No .....0 |  |  |
| 710                                                                                  | People are generally caring and sympathetic towards people with lymphoedema.                           | Yes .....1 | No .....0 |  |  |
| 711                                                                                  | Caring for people with lymphoedema is the responsibility of the family                                 | Yes .....1 | No .....0 |  |  |
| 712                                                                                  | Lymphoedema is transmitted from person to person                                                       | Yes .....1 | No .....0 |  |  |
| 713                                                                                  | If I am served together with someone with lymphoedema, I will eat the food with no complaint           | Yes .....1 | No .....0 |  |  |
| <b>Section 6: Care and management of people with lymphoedema</b>                     |                                                                                                        |            |           |  |  |
| 801                                                                                  | Do you think lymphoedema is treatable?                                                                 | Yes .....1 | No .....0 |  |  |
| 802                                                                                  | Is there a lymphoedema health service in your district?                                                | Yes .....1 | No .....0 |  |  |
| 803                                                                                  | Information about lymphoedema is available at nearby health center.                                    | Yes .....1 | No .....0 |  |  |

|     |                                                                                                       |                                                                                                                                                                                                                         |           |  |  |  |
|-----|-------------------------------------------------------------------------------------------------------|-------------------------------------------------------------------------------------------------------------------------------------------------------------------------------------------------------------------------|-----------|--|--|--|
| 804 | The best treatment for lymphoedema is medication.                                                     | Yes .....1                                                                                                                                                                                                              | No .....0 |  |  |  |
| 805 | The best treatment for lymphoedema is holy water                                                      | Yes .....1                                                                                                                                                                                                              | No .....0 |  |  |  |
| 806 | The best treatment for lymphoedema is with traditional healers.                                       | Yes .....1                                                                                                                                                                                                              | No .....0 |  |  |  |
| 807 | The best treatment for lymphoedema is prayer at Church                                                | Yes .....1                                                                                                                                                                                                              | No .....0 |  |  |  |
| 808 | Can you tell me any ways of treating lymphoedema?                                                     | 1. Washing feet<br>2. Using soap<br>3. Using ointment<br>4. Using bandages<br>5. Using socks and shoes<br>6. Doing foot/leg exercises<br>7. Elevating the feet at night<br>8. Other (Specify) _____<br>99. I don't know |           |  |  |  |
| 809 | As soon as a person shows signs of lymphoedema, he should be taken to holy water                      | Yes .....1                                                                                                                                                                                                              | No .....0 |  |  |  |
| 810 | As soon as a person shows signs of lymphoedema, he should be taken to a witch doctor ( <i>awaqi</i> ) | Yes .....1                                                                                                                                                                                                              | No .....0 |  |  |  |
| 811 | As soon as a person shows signs of lymphoedema, he should be taken to a health center                 | Yes .....1                                                                                                                                                                                                              | No .....0 |  |  |  |
| 812 | People with lymphoedema have for too long been the subject of ridicule                                | Yes .....1                                                                                                                                                                                                              | No .....0 |  |  |  |
| 813 | We have a responsibility to provide the best possible care for people with lymphoedema                | Yes .....1                                                                                                                                                                                                              | No .....0 |  |  |  |
| 814 | People with lymphoedema don't deserve our sympathy                                                    | Yes .....1                                                                                                                                                                                                              | No .....0 |  |  |  |
| 815 | People with lymphoedema are a burden on society                                                       | Yes .....1                                                                                                                                                                                                              | No .....0 |  |  |  |
| 816 | Increased spending on treatment of lymphoedema at health services is a waste of money                 | Yes .....1                                                                                                                                                                                                              | No .....0 |  |  |  |
| 817 | There are sufficient existing services for people with lymphoedema                                    | Yes .....1                                                                                                                                                                                                              | No .....0 |  |  |  |
| 818 | People with lymphoedema shouldn't be given any responsibility                                         | Yes .....1                                                                                                                                                                                                              | No .....0 |  |  |  |
| 819 | Anyone with a history of lymphoedema problems should be excluded from taking public office            | Yes .....1                                                                                                                                                                                                              | No .....0 |  |  |  |
| 820 | No-one has the right to exclude people with lymphoedema from their neighborhood                       | Yes .....1                                                                                                                                                                                                              | No .....0 |  |  |  |

## Section 7: Social Distance Scale

Please read following statement (**vignette**)

Abeba is a 27-year-old woman. She has been treated for lymphoedema during the past year. Her leg is still swollen. Abeba has a job in the local small business that belongs to her uncle. She earns Birr 10 thousands per month and is doing well in her job. She is a little bit slower than before, because of the effects of lymphoedema on her leg, but the employer never complained about that. At her job, Abeba gets along well with her colleagues. Abeba would like to get married. She is considering joining a local youth organization, so she can meet people of the same age. She also hopes to get a better job to be able to earn more than her present job.

Please, select your most fit to your opinion

|     |                                                                             |                          |                             |  |  |
|-----|-----------------------------------------------------------------------------|--------------------------|-----------------------------|--|--|
| 901 | How would you feel about renting a room in your home to someone like Abeba? | Definitely willing... 0  | Probably willing.....1      |  |  |
|     |                                                                             | Probably not willing...2 | Definitely not willing... 3 |  |  |

|     |                                                                                                   |                                                |                                                                                |  |  |
|-----|---------------------------------------------------------------------------------------------------|------------------------------------------------|--------------------------------------------------------------------------------|--|--|
| 902 | How about being a worker on the same job with someone like Abeba?                                 | None of time... .. 1<br>Some of the time.....3 | A little of time .....2<br>Most of the time... .. 4<br>All of the time... .. 5 |  |  |
| 903 | How would you feel having someone like Abeba as a neighbor?                                       | None of time... .. 1<br>Some of the time.....3 | A little of time .....2<br>Most of the time... .. 4<br>All of the time... .. 5 |  |  |
| 904 | How about having someone like Abeba as caretaker of your children for a couple of hours?          | None of time... .. 1<br>Some of the time.....3 | A little of time .....2<br>Most of the time... .. 4<br>All of the time... .. 5 |  |  |
| 905 | How about having one of your children marry someone like Abeba?                                   | None of time... .. 1<br>Some of the time.....3 | A little of time .....2<br>Most of the time... .. 4<br>All of the time... .. 5 |  |  |
| 906 | How would you feel about introducing Abeba to a young woman you are friendly with?                | None of time... .. 1<br>Some of the time.....3 | A little of time .....2<br>Most of the time... .. 4<br>All of the time... .. 5 |  |  |
| 907 | How would you feel about recommending someone like Abeba for a job working for a friend of yours? | None of time... .. 1<br>Some of the time.....3 | A little of time .....2<br>Most of the time... .. 4<br>All of the time... .. 5 |  |  |
