# Supplementary material for: The role of a community conversation intervention in reducing stigma related to lower limb lymphoedema in Northern Ethiopia
Source: Springer Nature journal article supplement (doi:10.1186/s12913-024-10864-w), 2024-03-19
Supplement: MOESM2 [file 26876654]

## Lymphoedema in Awi zone

### Patient cohort Questionnaire

#### INTERVIEW DETAILS

|     |                                          |                            |           |
|-----|------------------------------------------|----------------------------|-----------|
| 001 | Ethiopian calendar Interview date (E.C.) | [ ][ ]/[ ][ ]/[ ][ ][ ][ ] | EClaydate |
| 002 | European Calendar Interview date (G.C.)  | [ ][ ]/[ ][ ]/[ ][ ][ ][ ] | GClaydate |
| 003 | Health center name                       |                            | Cname     |
| 004 | Health center code                       |                            | cid       |
| 005 | Sex (by observation)                     | Male                       | 0         |
|     |                                          | Female                     | 1         |
|     |                                          |                            | gend      |

#### Eligibility criteria

|                                                                                                                                                                     |                                                                                                                                 |     |   |          |
|---------------------------------------------------------------------------------------------------------------------------------------------------------------------|---------------------------------------------------------------------------------------------------------------------------------|-----|---|----------|
| 006                                                                                                                                                                 | Is the respondent a resident of Guagusa Shikudad district?<br>(Resident at least in the past 6 months)                          | No  | 0 | eligres  |
|                                                                                                                                                                     |                                                                                                                                 | Yes | 1 |          |
| 007                                                                                                                                                                 | Is the respondent above 18 years old?                                                                                           | No  | 0 | eligage  |
|                                                                                                                                                                     |                                                                                                                                 | Yes | 1 |          |
| 008                                                                                                                                                                 | Is the respondent able to hear sufficiently, i.e. the respondent does not have difficulty communicating because she/he is deaf? | No  | 0 | eligcom  |
|                                                                                                                                                                     |                                                                                                                                 | Yes | 1 |          |
| 009                                                                                                                                                                 | Is the respondent able to communicate sufficiently in Amharic?                                                                  | No  | 0 | Elignonc |
|                                                                                                                                                                     |                                                                                                                                 | Yes | 1 |          |
| 010                                                                                                                                                                 | Is the respondent healthy enough to take part, i.e. the respondent is not acutely ill or in pain?                               | No  | 0 | eligill  |
|                                                                                                                                                                     |                                                                                                                                 | Yes | 1 |          |
| If the is any '0' scoring for any question between 006 and 010, the respondent is not eligible.<br>If the respondent is not eligible, thank him/her and discontinue |                                                                                                                                 |     |   |          |
| <b>If the respondent is eligible, proceed to consent</b>                                                                                                            |                                                                                                                                 |     |   |          |

|            |                                                                                                                                                                                                                                              |     |   |             |
|------------|----------------------------------------------------------------------------------------------------------------------------------------------------------------------------------------------------------------------------------------------|-----|---|-------------|
| <b>011</b> | Has the respondent consented to participate in the study?                                                                                                                                                                                    | No  | 0 | Consent     |
|            |                                                                                                                                                                                                                                              | Yes | 1 |             |
| <b>012</b> | If the respondent is not willing to participate in the study, what is his/her reason?<br>Write reason briefly in the next column. (Ask in a non-coercive way about reason. If person does not want to respond, thank them and end interview) |     |   | Non consent |

If the respondent is eligible and has consented to participate in the study – write their contact information below [This identifying detail will be extracted from the data and put separately for confidentiality]

|            |                                      |  |        |
|------------|--------------------------------------|--|--------|
| <b>013</b> | Participant Name                     |  | PNA    |
| <b>014</b> | Participant ID                       |  | PID    |
| <b>015</b> | Kebele                               |  | Kebele |
| <b>016</b> | Gott                                 |  | Got    |
| <b>017</b> | Telephone number                     |  | Tele   |
| <b>018</b> | Additional<br>telephone number       |  | Tele2  |
| <b>019</b> | Name of the head<br>of the household |  | Nhead  |

| SECTION 1: General Information |                                                                                             |                                                                                                                                           |    |       |
|--------------------------------|---------------------------------------------------------------------------------------------|-------------------------------------------------------------------------------------------------------------------------------------------|----|-------|
| 101                            | Participant's card No<br>(complete this by looking at the participant's card)               |                                                                                                                                           |    | PCNO  |
| 102                            | Sex (by observation)                                                                        | Male                                                                                                                                      | 0  | SEX   |
|                                |                                                                                             | Female                                                                                                                                    | 1  |       |
| 103                            | Age                                                                                         | _____ Years                                                                                                                               |    | age   |
| 104                            | Educational background<br>(What is the highest level of education you have completed?)      | Illiterate[->go to Q 106]                                                                                                                 | 1  | EDU   |
|                                |                                                                                             | Can read and write but didn't attend formal education (e.g learned at church or mosque or got non formal basic education) [->go to Q 106] | 2  |       |
|                                |                                                                                             | Attended formal education [->go to Q 105]                                                                                                 | 3  |       |
| 105                            | If you attended formal education, up to what grade/level did you attend?<br><br>E.g Grade 6 | _____                                                                                                                                     |    | EDUYR |
| 106                            | Marital status (What is your current marital status)?                                       | Never Married                                                                                                                             | 1  | MARIT |
|                                |                                                                                             | Married                                                                                                                                   | 2  |       |
|                                |                                                                                             | Divorced                                                                                                                                  | 3  |       |
|                                |                                                                                             | Widowed                                                                                                                                   | 4  |       |
|                                |                                                                                             | Married but not living together                                                                                                           | 5  |       |
|                                |                                                                                             | Cohabiting                                                                                                                                | 6  |       |
| 107                            | Religion (what is your religion?)                                                           | Christian                                                                                                                                 | 1  | RELIG |
|                                |                                                                                             | Muslim                                                                                                                                    | 2  |       |
|                                |                                                                                             | If other [specify]_____                                                                                                                   | 77 |       |
| 108                            | Living place (where do you live, in urban or rural kebele?)                                 | Urban                                                                                                                                     | 0  | PLRES |
|                                |                                                                                             | Rural                                                                                                                                     | 1  |       |

|     |                                                                                                                       |                                              |    |        |
|-----|-----------------------------------------------------------------------------------------------------------------------|----------------------------------------------|----|--------|
| 109 | How do you primarily spend your time in a typical day?                                                                | Paid work                                    | 1  | EMP    |
|     |                                                                                                                       | Private work (shopkeeper, own business, etc) | 2  |        |
|     |                                                                                                                       | Private work (farming)                       | 3  |        |
|     |                                                                                                                       | Housewife (work in the home and child care)  | 4  |        |
|     |                                                                                                                       | Study                                        | 5  |        |
|     |                                                                                                                       | Unemployed                                   | 6  |        |
|     |                                                                                                                       | Other (specify)                              | 77 |        |
| 110 | When you compare yourself with other people in your neighborhood, how would you express your family's current income? | Very low                                     | 1  | REINC  |
|     |                                                                                                                       | Low                                          | 2  |        |
|     |                                                                                                                       | Middle                                       | 3  |        |
|     |                                                                                                                       | High                                         | 4  |        |
|     |                                                                                                                       | Very high                                    | 5  |        |
| 111 | Do you have children?                                                                                                 | No [Skip to next section (Section 2)]        | 0  | KIDS   |
|     |                                                                                                                       | Yes                                          | 1  |        |
| 112 | How many children do you have?                                                                                        | [ ] [ ]                                      |    | KIDSNO |
| 113 | How old is your youngest child?                                                                                       | [ ] [ ] year                                 |    | KIDYR  |

| SECTION 3: MMDP assessment (fill it by examining the participant) |                                    |           |     |   |     |
|-------------------------------------------------------------------|------------------------------------|-----------|-----|---|-----|
| 301                                                               | Case                               | LF/podo   |     | 1 | CAS |
|                                                                   |                                    | Leprosy   |     | 2 |     |
| 302                                                               | Sign of bacterial/Fungal infection | Right leg | No  | 0 | INF |
|                                                                   |                                    |           | Yes | 1 |     |

|     |                                                           |                                                                     |                 |             |     |
|-----|-----------------------------------------------------------|---------------------------------------------------------------------|-----------------|-------------|-----|
|     |                                                           | Left leg                                                            | No              | 0           |     |
|     |                                                           |                                                                     | Yes             | 1           |     |
| 303 | Wounds                                                    | Right leg                                                           | No              | 0           | WOU |
|     |                                                           |                                                                     | Yes             | 1           |     |
|     |                                                           | Left leg                                                            | No              | 0           |     |
|     |                                                           |                                                                     | Yes             | 1           |     |
| 304 | Nodules                                                   | Right leg                                                           | No              | 0           | NOD |
|     |                                                           |                                                                     | Yes             | 1           |     |
|     |                                                           | Left leg                                                            | No              | 0           |     |
|     |                                                           |                                                                     | Yes             | 1           |     |
| 305 | Swelling size                                             | Longitudinal Circumference at the biggest swelling site measurement | Right lower leg | Long@ _____ | SWS |
|     |                                                           |                                                                     |                 | Size _____  |     |
|     |                                                           |                                                                     | Left lower leg  | Long@ _____ |     |
|     |                                                           |                                                                     |                 | Size _____  |     |
|     |                                                           | Latitudinal circumference at the biggest swelling site measurement  | Right foot      | Lat@ _____  |     |
|     |                                                           |                                                                     |                 | Size _____  |     |
|     |                                                           |                                                                     | Left foot       | Lat@ _____  |     |
|     |                                                           |                                                                     |                 | Size _____  |     |
| 306 | Lymphoedema Stage<br>(Use podoconiosis lymphoedema scale) | Right leg                                                           | _____           |             | LES |
|     |                                                           | Left leg                                                            | _____           |             |     |
| 307 | Leprosy disability grade                                  |                                                                     |                 |             | LEG |
| 308 | Has your leg ever suddenly become hot, red and painful?   | No                                                                  |                 | 0           | AAH |
|     |                                                           | Yes                                                                 |                 | 1           |     |
| 309 | How often does your leg become hot, red and painful?      | Every week                                                          |                 | 1           | HOA |
|     |                                                           | Every two weeks                                                     |                 | 2           |     |

|     |                                                                          |                            |   |     |
|-----|--------------------------------------------------------------------------|----------------------------|---|-----|
|     | (acute attack)                                                           | Every month                | 3 |     |
|     |                                                                          | Every 3 months             | 4 |     |
|     |                                                                          | Every 6 months             | 5 |     |
|     |                                                                          | Every year                 | 6 |     |
|     |                                                                          | Less often than every year | 7 |     |
| 310 | Acute attack/reaction in the last month<br><br>(Number of episodes)      |                            |   | AAT |
| 311 | Have you ever received treatment for your leg lymphoedema                | No [→go to section 4]      | 0 | LTH |
|     |                                                                          | Yes [→go to Q 312]         | 1 |     |
| 312 | Are you currently receiving treatment for, or self-treating your leg(s)? | No                         | 0 | ACT |
|     |                                                                          | Yes                        | 1 |     |
| 313 | From where are you receiving treatment?                                  | Government clinic          | 1 | LTD |
|     |                                                                          | Non-government clinic      | 2 |     |
|     |                                                                          | Pharmacy                   | 3 |     |
|     |                                                                          | Traditional healer         | 4 |     |
|     |                                                                          | Friend or family           | 5 |     |
|     |                                                                          | Self-treatment             | 6 |     |
|     |                                                                          | Other(Specify)             | 7 |     |
| 314 | Can you describe the treatment you are using?                            |                            |   | CDT |

**SECTION 7: Social support scale (OSLO 3)**

|     |                                                                                                                           |                               |   |       |
|-----|---------------------------------------------------------------------------------------------------------------------------|-------------------------------|---|-------|
| 701 | How easy is it to get practical help from neighbors if you should need it?                                                | Very difficult                | 1 | OSAS  |
|     |                                                                                                                           | Difficult                     | 2 |       |
|     |                                                                                                                           | Possible                      | 3 |       |
|     |                                                                                                                           | Easy                          | 4 |       |
|     |                                                                                                                           | Very easy                     | 5 |       |
| 702 | How many people are so close to you that you can count on them if you have serious personal problems (choose one option)? | None                          | 1 | OSCRS |
|     |                                                                                                                           | 1 or 2                        | 2 |       |
|     |                                                                                                                           | 3-5                           | 3 |       |
|     |                                                                                                                           | More than 5                   | 4 |       |
| 703 | How much concern do people show in what you are doing (choose one option)?                                                | Little concern and interest   | 1 | OSNPS |
|     |                                                                                                                           | Uncertain                     | 2 |       |
|     |                                                                                                                           | Some concern and interest     | 3 |       |
|     |                                                                                                                           | A lot of concern and interest | 4 |       |

**SECTION 8: Discrimination (DISC)**

In this section, I would like to ask about times in the last 6 months when you have been treated unfairly because of your lymphoedema and co-morbid mental health. In this section, there are 19 questions. Please give a response for each.

|     |                                                                                                                                               |                |    |        |
|-----|-----------------------------------------------------------------------------------------------------------------------------------------------|----------------|----|--------|
| 801 | Have you been treated unfairly in making or keeping friends?                                                                                  | Not at all     | 0  | DIFUR6 |
|     |                                                                                                                                               | A little       | 1  |        |
|     |                                                                                                                                               | Moderately     | 2  |        |
|     |                                                                                                                                               | A lot          | 3  |        |
|     |                                                                                                                                               | Not applicable | 99 |        |
| 802 | Have you been treated unfairly by the people in your neighborhoods?                                                                           | Not at all     | 0  | DNAU6  |
|     |                                                                                                                                               | A little       | 1  |        |
|     |                                                                                                                                               | Moderately     | 2  |        |
|     |                                                                                                                                               | A lot          | 3  |        |
|     |                                                                                                                                               | Not applicable | 99 |        |
| 803 | Have you been treated unfairly in dating or intimate relationships? (excluding treatment by spouse or co-habiting partner as covered by Q806) | Not at all     | 0  | DLFUA6 |
|     |                                                                                                                                               | A little       | 1  |        |
|     |                                                                                                                                               | Moderately     | 2  |        |
|     |                                                                                                                                               | A lot          | 3  |        |
|     |                                                                                                                                               | Not applicable | 99 |        |
| 804 | Have you been treated unfairly in housing? (including becoming homeless)                                                                      | Not at all     | 0  | DHRUM6 |
|     |                                                                                                                                               | A little       | 1  |        |
|     |                                                                                                                                               | Moderately     | 2  |        |
|     |                                                                                                                                               | A lot          | 3  |        |
|     |                                                                                                                                               | Not applicable | 99 |        |
| 805 | Have you been treated unfairly in your education? (ask about school, college, university, on the job training, vocational courses)            | Not at all     | 0  | DECUT6 |
|     |                                                                                                                                               | A little       | 1  |        |
|     |                                                                                                                                               | Moderately     | 2  |        |
|     |                                                                                                                                               | A lot          | 3  |        |



|     |                                                                                                                                                                                                                             |                |    |        |
|-----|-----------------------------------------------------------------------------------------------------------------------------------------------------------------------------------------------------------------------------|----------------|----|--------|
|     |                                                                                                                                                                                                                             | Not applicable | 99 |        |
| 806 | Have you been treated unfairly in marriage or divorce? (including co-habiting or civil partnership. Ask about ability to find a partner or spouse, problems during the relationship, divorce settlements)                   | Not at all     | 0  | DMRD6  |
|     |                                                                                                                                                                                                                             | A little       | 1  |        |
|     |                                                                                                                                                                                                                             | Moderately     | 2  |        |
|     |                                                                                                                                                                                                                             | A lot          | 3  |        |
|     |                                                                                                                                                                                                                             | Not applicable | 99 |        |
| 807 | Have you been treated unfairly by your family? (ask about family of origin – parents, brothers, sisters and other relations as well as any children. Exclude treatment by spouse or co-habiting partner as covered by Q806) | Not at all     | 0  | DFBSR6 |
|     |                                                                                                                                                                                                                             | A little       | 1  |        |
|     |                                                                                                                                                                                                                             | Moderately     | 2  |        |
|     |                                                                                                                                                                                                                             | A lot          | 3  |        |
|     |                                                                                                                                                                                                                             | Not applicable | 99 |        |
| 808 | Have you been treated unfairly in finding a job? (this means finding full or part-time paid work)                                                                                                                           | Not at all     | 0  | DGWU6  |
|     |                                                                                                                                                                                                                             | A little       | 1  |        |
|     |                                                                                                                                                                                                                             | Moderately     | 2  |        |
|     |                                                                                                                                                                                                                             | A lot          | 3  |        |
|     |                                                                                                                                                                                                                             | Not applicable | 99 |        |
| 809 | Have you been treated unfairly in keeping a job?                                                                                                                                                                            | Not at all     | 0  | DWEU6  |
|     |                                                                                                                                                                                                                             | A little       | 1  |        |
|     |                                                                                                                                                                                                                             | Moderately     | 2  |        |
|     |                                                                                                                                                                                                                             | A lot          | 3  |        |
|     |                                                                                                                                                                                                                             | Not applicable | 99 |        |
| 810 | Have you been treated unfairly when using public transport? (ask about using free travel pass, passengers, drivers, etc)                                                                                                    | Not at all     | 0  | DPRTU6 |
|     |                                                                                                                                                                                                                             | A little       | 1  |        |
|     |                                                                                                                                                                                                                             | Moderately     | 2  |        |

|     |                                                                                                                                                                                    |                |    |        |
|-----|------------------------------------------------------------------------------------------------------------------------------------------------------------------------------------|----------------|----|--------|
|     |                                                                                                                                                                                    | A lot          | 3  |        |
|     |                                                                                                                                                                                    | Not applicable | 99 |        |
| 811 | Have you been treated unfairly in your religious practices? (ask about attending church, other church members, church leaders)                                                     | Not at all     | 0  | DUDBO6 |
|     |                                                                                                                                                                                    | A little       | 1  |        |
|     |                                                                                                                                                                                    | Moderately     | 2  |        |
|     |                                                                                                                                                                                    | A lot          | 3  |        |
|     |                                                                                                                                                                                    | Not applicable | 99 |        |
| 812 | Have you been treated unfairly in your social life? (ask about socializing, hobbies, attending events, leisure activities)                                                         | Not at all     | 0  | DSLPT6 |
|     |                                                                                                                                                                                    | A little       | 1  |        |
|     |                                                                                                                                                                                    | Moderately     | 2  |        |
|     |                                                                                                                                                                                    | A lot          | 3  |        |
|     |                                                                                                                                                                                    | Not applicable | 99 |        |
| 813 | Have you been treated unfairly when getting help for physical health problems? (ask about GP, dentist, nurses, health officers, health extension workers, and emergency treatment) | Not at all     | 0  | DPBHP6 |
|     |                                                                                                                                                                                    | A little       | 1  |        |
|     |                                                                                                                                                                                    | Moderately     | 2  |        |
|     |                                                                                                                                                                                    | A lot          | 3  |        |
|     |                                                                                                                                                                                    | Not applicable | 99 |        |
| 814 | Have you been treated unfairly in your personal safety and security? (ask about verbal abuse, physical abuse, assault)                                                             | Not at all     | 0  | DPSRT6 |
|     |                                                                                                                                                                                    | A little       | 1  |        |
|     |                                                                                                                                                                                    | Moderately     | 2  |        |
|     |                                                                                                                                                                                    | A lot          | 3  |        |
|     |                                                                                                                                                                                    | Not applicable | 99 |        |
| 815 |                                                                                                                                                                                    | Not at all     | 0  | DFCPD6 |

|     |                                                                                                                                                                                                                                |                          |    |           |
|-----|--------------------------------------------------------------------------------------------------------------------------------------------------------------------------------------------------------------------------------|--------------------------|----|-----------|
|     | Have you been treated unfairly in starting a family or having children? (ask about the behavior of health professionals, friends and family, as well as how they or their partner were treated during pregnancy or childbirth) | A little                 | 1  |           |
|     |                                                                                                                                                                                                                                | Moderately               | 2  |           |
|     |                                                                                                                                                                                                                                | A lot                    | 3  |           |
|     |                                                                                                                                                                                                                                | Not applicable           | 99 |           |
| 816 | Have you been treated unfairly in your role as a parent to your children? (ask about behavior of other parents, teachers, family or health staff)                                                                              | Not at all               | 0  | DFRT6     |
|     |                                                                                                                                                                                                                                | A little                 | 1  |           |
|     |                                                                                                                                                                                                                                | Moderately               | 2  |           |
|     |                                                                                                                                                                                                                                | A lot                    | 3  |           |
|     |                                                                                                                                                                                                                                | Not applicable           | 99 |           |
| 817 | Have you been treated unfairly in your levels of privacy? (ask about privacy in hospital and in community settings, eg private letters or phone calls, medical records)                                                        | Not at all               | 0  | dpriv6    |
|     |                                                                                                                                                                                                                                | A little                 | 1  |           |
|     |                                                                                                                                                                                                                                | Moderately               | 2  |           |
|     |                                                                                                                                                                                                                                | A lot                    | 3  |           |
|     |                                                                                                                                                                                                                                | Not applicable           | 99 |           |
| 818 | How much do you agree with the following statement:<br><br>I feel that receiving treatment for my lymphoedema and co-morbid mental health problems has led to people tending to treat me more fairly                           | Strongly agree           | 1  | dtreat6   |
|     |                                                                                                                                                                                                                                | Agree                    | 2  |           |
|     |                                                                                                                                                                                                                                | Neither agree / disagree | 3  |           |
|     |                                                                                                                                                                                                                                | Disagree                 | 4  |           |
|     |                                                                                                                                                                                                                                | Strongly disagree        | 5  |           |
| 819 | <u>Main source of information for DISC</u>                                                                                                                                                                                     | Patient                  | 1  | discinfo6 |
|     |                                                                                                                                                                                                                                | Caregiver                | 2  |           |
|     |                                                                                                                                                                                                                                | Both                     | 3  |           |

| SECTION 9: Internalized Stigma Related to Lymphoedema (ISRL)                                                                                                                                                                                                                                     |                                                                        |                   |   |         |
|--------------------------------------------------------------------------------------------------------------------------------------------------------------------------------------------------------------------------------------------------------------------------------------------------|------------------------------------------------------------------------|-------------------|---|---------|
| <p>We are going to use the term "lymphoedema illness" in the rest of this questionnaire, but please think of it as whatever you feel is the best term for it.</p> <p>I will ask you some questions about these problems. Let me know if you agree or disagree with the following statements.</p> |                                                                        |                   |   |         |
| 901                                                                                                                                                                                                                                                                                              | I feel out of place in the world because of my illness                 | Strongly disagree | 1 | _ISMI01 |
|                                                                                                                                                                                                                                                                                                  |                                                                        | Disagree          | 2 |         |
|                                                                                                                                                                                                                                                                                                  |                                                                        | Agree             | 3 |         |
|                                                                                                                                                                                                                                                                                                  |                                                                        | Strongly agree    | 4 |         |
| 902                                                                                                                                                                                                                                                                                              | I am embarrassed or ashamed of these problems                          | Strongly disagree | 1 | _ISMI05 |
|                                                                                                                                                                                                                                                                                                  |                                                                        | Disagree          | 2 |         |
|                                                                                                                                                                                                                                                                                                  |                                                                        | Agree             | 3 |         |
|                                                                                                                                                                                                                                                                                                  |                                                                        | Strongly agree    | 4 |         |
| 903                                                                                                                                                                                                                                                                                              | I am disappointed in myself due to these problems                      | Strongly disagree | 1 | _ISMI16 |
|                                                                                                                                                                                                                                                                                                  |                                                                        | Disagree          | 2 |         |
|                                                                                                                                                                                                                                                                                                  |                                                                        | Agree             | 3 |         |
|                                                                                                                                                                                                                                                                                                  |                                                                        | Strongly agree    | 4 |         |
| 904                                                                                                                                                                                                                                                                                              | These problems have spoiled my life                                    | Strongly disagree | 1 | _ISMI17 |
|                                                                                                                                                                                                                                                                                                  |                                                                        | Disagree          | 2 |         |
|                                                                                                                                                                                                                                                                                                  |                                                                        | Agree             | 3 |         |
|                                                                                                                                                                                                                                                                                                  |                                                                        | Strongly agree    | 4 |         |
| 905                                                                                                                                                                                                                                                                                              | Because of these problems, I need others to make most decisions for me | Strongly disagree | 1 | _ISMI19 |
|                                                                                                                                                                                                                                                                                                  |                                                                        | Disagree          | 2 |         |
|                                                                                                                                                                                                                                                                                                  |                                                                        | Agree             | 3 |         |
|                                                                                                                                                                                                                                                                                                  |                                                                        | Strongly agree    | 4 |         |

|     |                                                                                     |                   |   |         |
|-----|-------------------------------------------------------------------------------------|-------------------|---|---------|
| 906 | I can't contribute anything to society because of these problems                    | Strongly disagree | 1 | _ISMI23 |
|     |                                                                                     | Disagree          | 2 |         |
|     |                                                                                     | Agree             | 3 |         |
|     |                                                                                     | Strongly agree    | 4 |         |
| 907 | People discriminate against me due to these problems                                | Strongly disagree | 1 | _ISMI03 |
|     |                                                                                     | Disagree          | 2 |         |
|     |                                                                                     | Agree             | 3 |         |
|     |                                                                                     | Strongly agree    | 4 |         |
| 908 | People often patronize me, or treat me like a child, just because of these problems | Strongly disagree | 1 | _ISMI15 |
|     |                                                                                     | Disagree          | 2 |         |
|     |                                                                                     | Agree             | 3 |         |
|     |                                                                                     | Strongly agree    | 4 |         |
| 909 | People ignore me or take me less seriously just because of these problems           | Strongly disagree | 1 | _ISMI22 |
|     |                                                                                     | Disagree          | 2 |         |
|     |                                                                                     | Agree             | 3 |         |
|     |                                                                                     | Strongly agree    | 4 |         |
| 910 | Nobody would be interested in getting close to me because of these problems         | Strongly disagree | 1 | _ISMI25 |
|     |                                                                                     | Disagree          | 2 |         |
|     |                                                                                     | Agree             | 3 |         |
|     |                                                                                     | Strongly agree    | 4 |         |
| 911 | Others think that I can't achieve much in life because of these problems            | Strongly disagree | 1 | _ISMI28 |
|     |                                                                                     | Disagree          | 2 |         |
|     |                                                                                     | Agree             | 3 |         |
|     |                                                                                     | Strongly agree    | 4 |         |
